# Supplementary material
Source: PubMed Central journal article supplement (PMC4383013)
Supplement: ncomms7596-s1.pdf [file ncomms7596-s1.pdf]

## **Supplementary Information**

### **Unravelling the hidden ancestry of American admixed populations.**

Francesco Montinaro<sup>1,2</sup>, George B.J. Busby<sup>2,4</sup>, Vincenzo L. Pascali<sup>1</sup>, Simon Myers<sup>3,4</sup>, Garrett Hellenthal<sup>5</sup>  
and Cristian Capelli<sup>2\*</sup>.

<sup>1</sup> Institute of Legal Medicine, Catholic University, Largo F. Vito, 1-00168, Rome, Italy

<sup>2</sup> Department of Zoology, University of Oxford, South Parks Road, Oxford, OX1 3PS, United Kingdom

<sup>3</sup> Department of Statistics, University of Oxford, 1 South Parks Road, , OX1 3TG, Oxford, United Kingdom

<sup>4</sup> Wellcome Trust Center for Human Genetics, Roosevelt Drive, OX3 7BN Oxford, United Kingdom

<sup>5</sup> UCL Genetics Institute, University College London, WC1E 6BT, Gower Street, United Kingdom

\*Corresponding author: Dr. Cristian Capelli: [cristian.capelli@zoo.ox.ac.uk](mailto:cristian.capelli@zoo.ox.ac.uk)

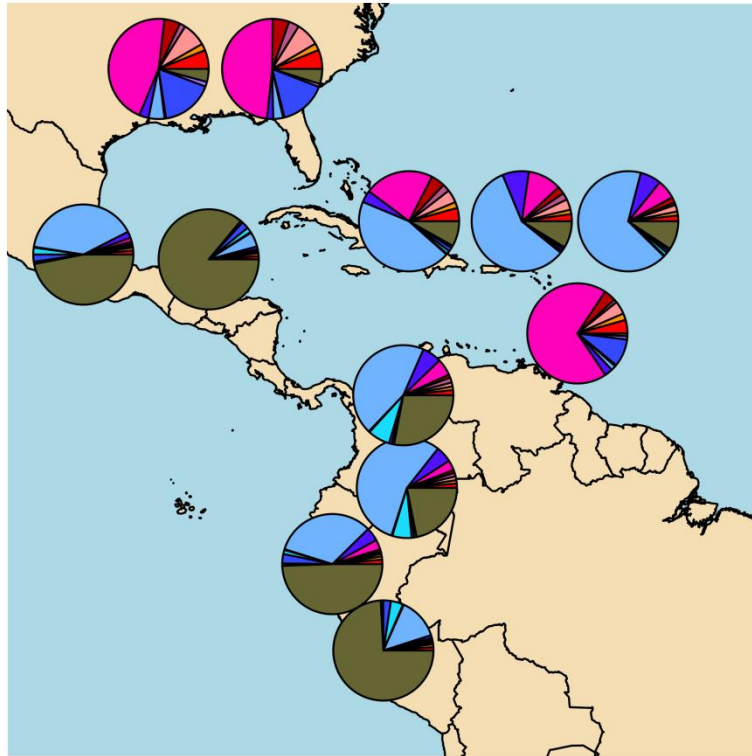

Supplementary Fig. 1: Ancestry composition of recipient populations based on the contribution of the 13 macro-areas identified by the means of fineSTRUCTURE analysis. Colors refer to the groups in Fig 1 and Fig. 2

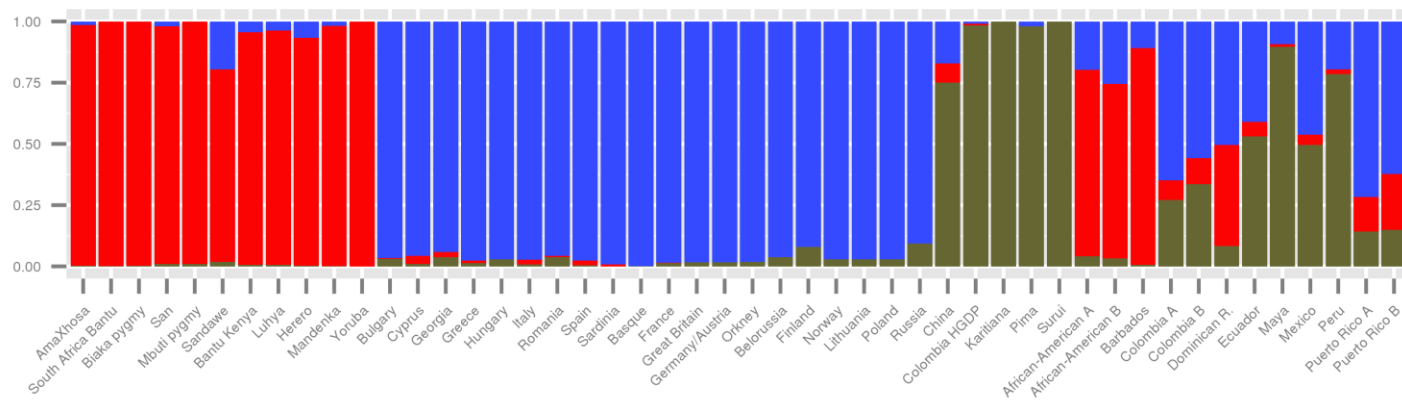

Supplementary Fig. 2: Average population ancestry estimated by ADMIXTURE analysis for the analyzed populations. The sample size of each population is reported in Supplementary Table 1.

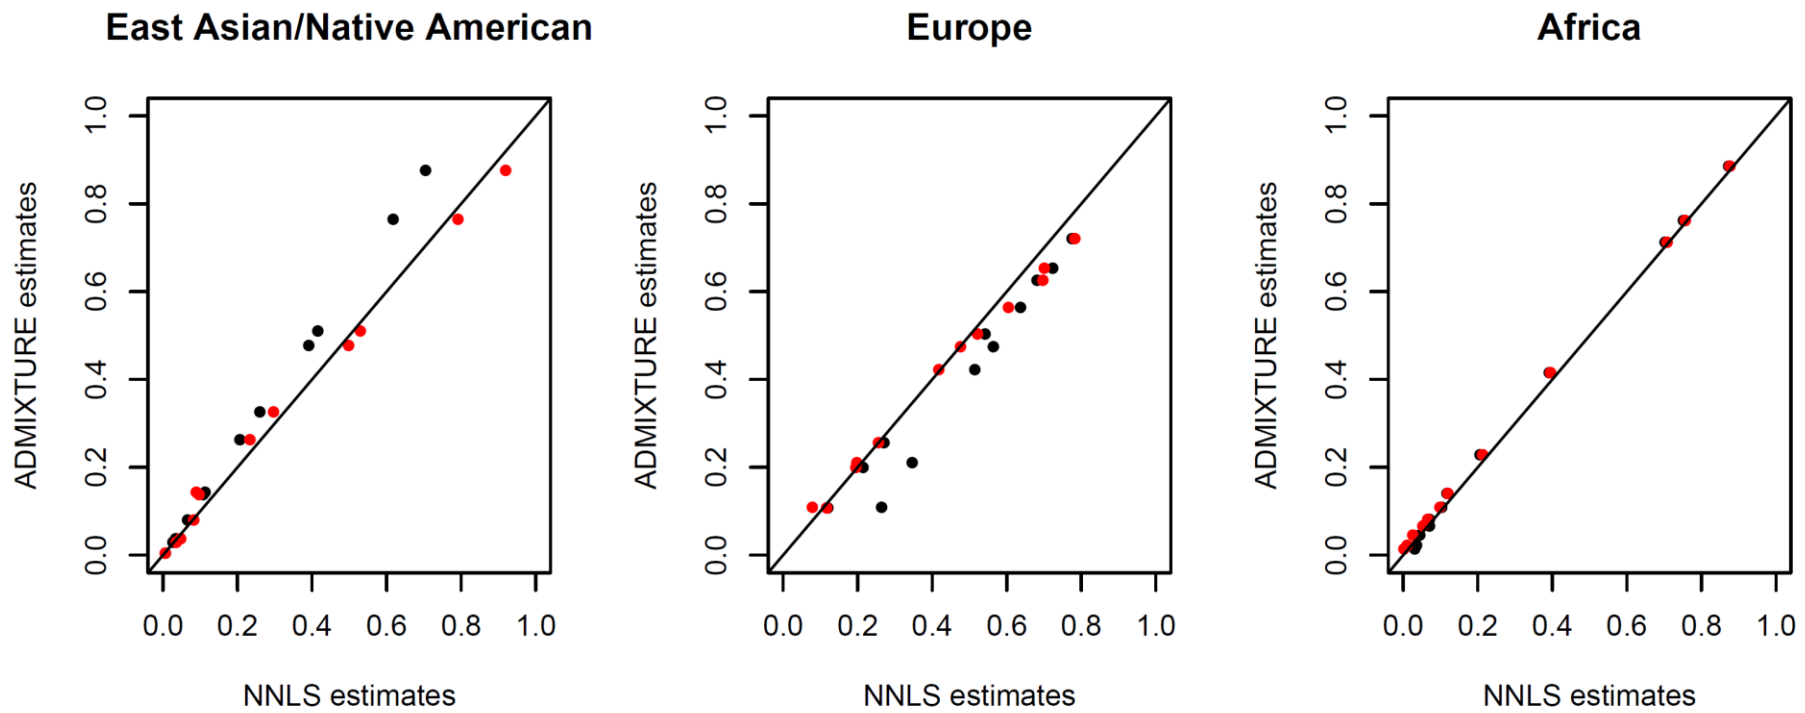

Supplementary Fig. 3: Comparison between East Asian “masked” and “unmasked” ancestry estimations vs. ADMIXTURE analysis. Each plot shows the relationship between the Continental ancestry estimated by ADMIXTURE at K=3 and that obtained by NNLS masking (red dots) or maintaining (black dots) East Asian contribution.

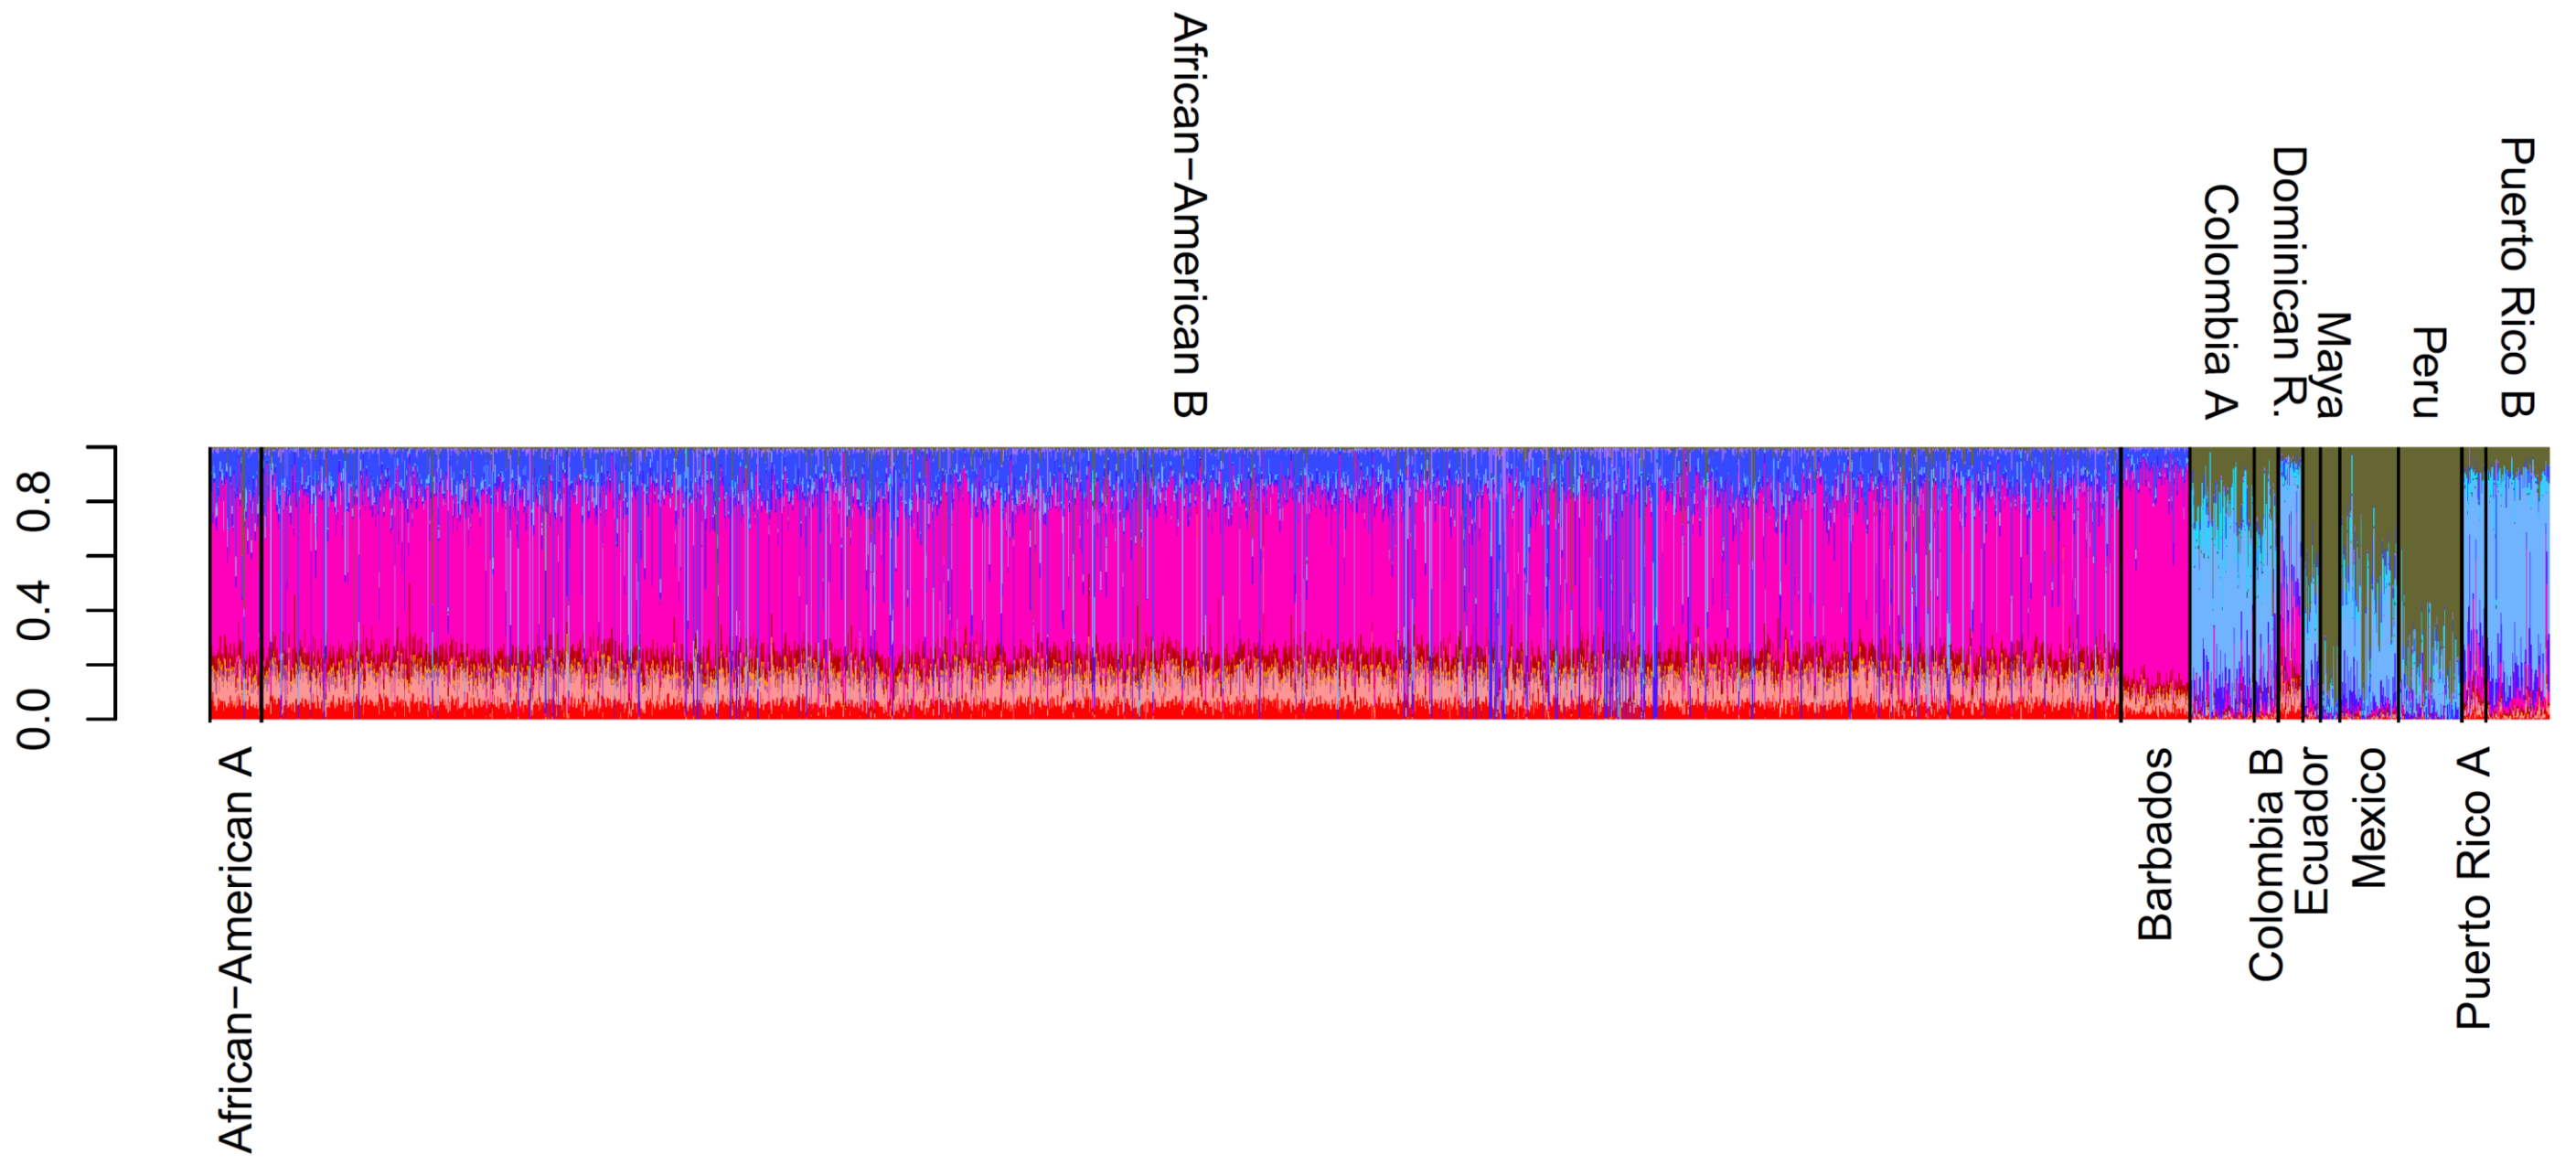

Supplementary Fig. 4: Individual ancestry composition estimated using the NNLS approach (see Methods) for the recipient populations analyzed. Each bar plot represents an individual and the colors follow group affiliation as in Fig 1 and Supplementary Table 1.

a

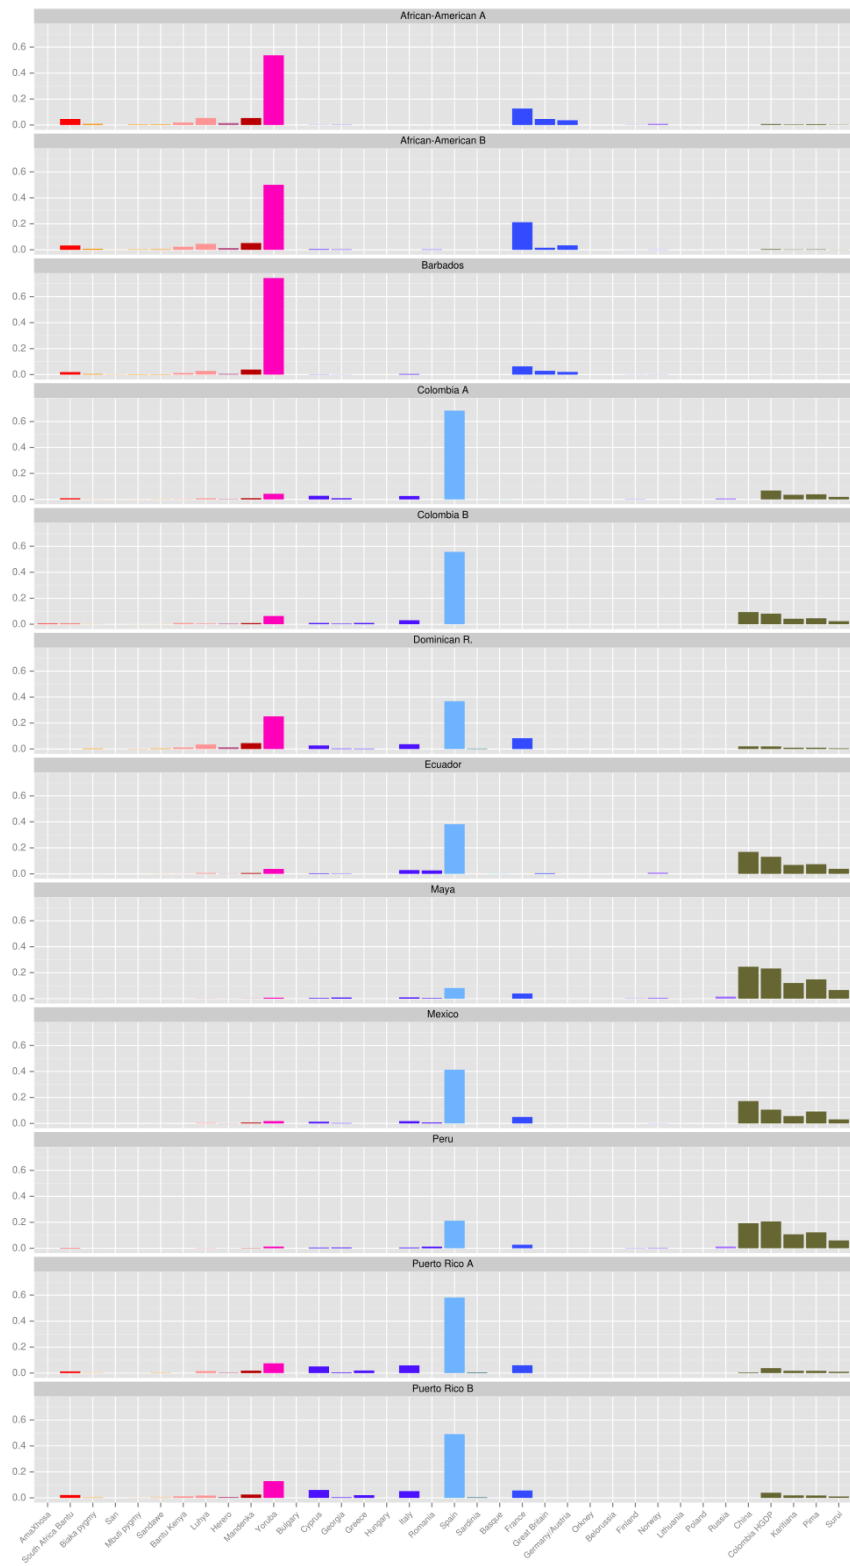

b

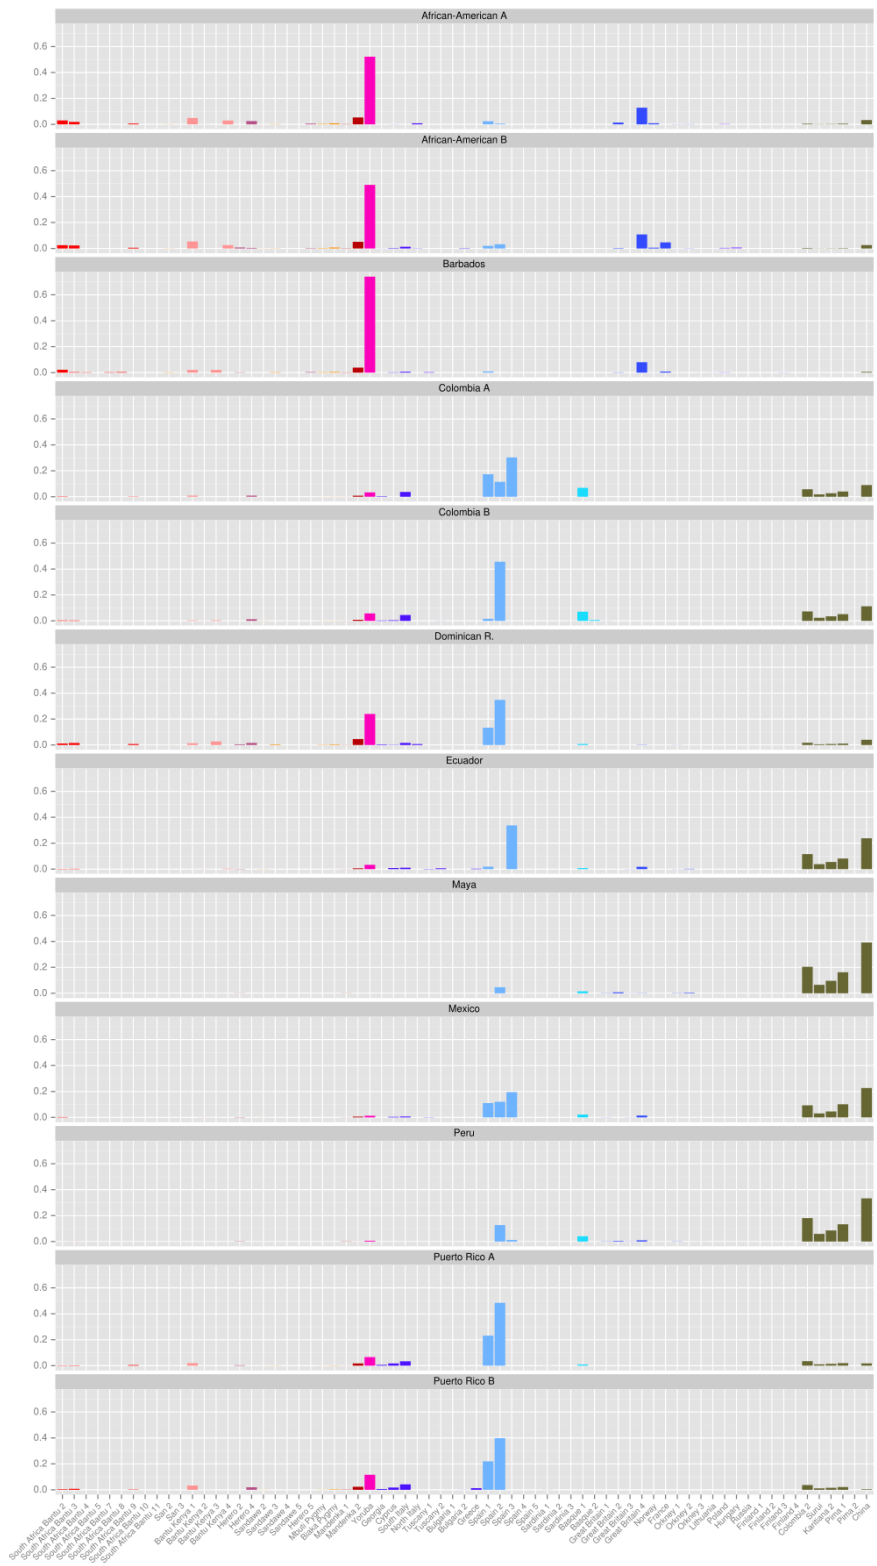

Supplementary Fig. 5: Comparison between population and cluster based ancestry estimates. Ancestry estimates using (a) populations or (b.) clusters as inferred by fineSTRUCTURE.

| Africa        | Group                   | Pre QC | After QC | Ref. | Europe                   | Macro-Area         | Pre QC      | After QC    | Ref.   |
|---------------|-------------------------|--------|----------|------|--------------------------|--------------------|-------------|-------------|--------|
|               | <i>W Africa</i>         |        |          |      |                          | <i>SE Europe</i>   |             |             |        |
|               | Yoruba A                | 101    | 101      | (1)  |                          | Spain A            | 97          | 97          | (1)    |
|               | Yoruba B                | 21     | 21       | (2)  |                          | Spain B            | 34          | 34          | (7, 8) |
|               | <i>Senegambia</i>       |        |          |      |                          | <i>SW Europe</i>   |             |             |        |
|               | Mandenka                | 22     | 22       | (2)  |                          | Bulgary            | 18          | 18          | (7)    |
|               | <i>E Africa</i>         |        |          |      |                          | Cyprus             | 12          | 12          | (8)    |
|               | Bantu Kenya             | 11     | 10       | (2)  |                          | East Sicily        | 10          | 10          | (7)    |
|               | Luhya                   | 97     | 87       | (1)  |                          | North Italy        | 12          | 12          | (2)    |
|               | <i>SW Africa</i>        |        |          |      |                          | Georgia            | 20          | 20          | (9)    |
|               | Herero                  | 12     | 12       | (3)  |                          | Greece             | 20          | 20          | (7)    |
|               | <i>S Africa</i>         |        |          |      |                          | Romania            | 14          | 14          | (8)    |
|               | AmaXhosa                | 15     | 15       | (4)  |                          | Tuscany A          | 100         | 98          | (1)    |
|               | South Africa Bantu A    | 8      | 6        | (2)  |                          | Tuscany B          | 8           | 8           | (2)    |
|               | South Africa Bantu B    | 20     | 20       | (3)  |                          | South Italy        | 18          | 18          | (7)    |
|               | South Africa Bantu C    | 94     | 94       | (5)  |                          | West Sicily        | 10          | 10          | (7)    |
|               | <i>Khoisan/Pygmies*</i> |        |          |      |                          | <i>Basque</i>      |             |             |        |
|               | Biaka pygmy             | 21     | 21       | (2)  |                          | Basque             | 24          | 24          | (2)    |
|               | Mbuti pygmy             | 13     | 13       | (2)  |                          | <i>Sardinia</i>    |             |             |        |
|               | San A                   | 19     | 19       | (3)  |                          | Sardinia           | 28          | 28          | (2)    |
|               | San B                   | 18     | 15       | (4)  |                          |                    |             |             |        |
|               | San C                   | 5      | 5        | (2)  |                          |                    |             |             |        |
|               | Sandawe                 | 28     | 23       | (6)  |                          |                    |             |             |        |
| <b>Europe</b> |                         |        |          |      | <b>East Asia/America</b> |                    |             |             |        |
|               | <i>NW Europe</i>        |        |          |      |                          | Colombia           | 7           | 7           | (2)    |
|               | England                 | 6      | 6        | (7)  |                          | Karitiana          | 14          | 14          | (2)    |
|               | France                  | 28     | 28       | (2)  |                          | Pima               | 14          | 14          | (2)    |
|               | Great Britain           | 99     | 96       | (1)  |                          | Surui              | 8           | 8           | (2)    |
|               | Ireland                 | 7      | 7        | (7)  |                          | China              | 100         | 100         | (1)    |
|               | Orkney                  | 15     | 15       | (2)  |                          |                    |             |             |        |
|               | Norway                  | 18     | 18       | (7)  |                          |                    |             |             |        |
|               | Scotland                | 6      | 6        | (7)  |                          |                    |             |             |        |
|               | Wales                   | 4      | 4        | (7)  |                          |                    |             |             |        |
|               | <i>NE Europe</i>        |        |          |      | <b>Recipients</b>        |                    |             |             |        |
|               | Finland A               | 100    | 100      | (1)  |                          | African-American A | 62          | 56          | (1)    |
|               | Finland B               | 2      | 2        | (7)  |                          | African-American B | 2162        | 2023        | (10)   |
|               | Germany and Austria     | 4      | 4        | (7)  |                          | Barbados           | 75          | 75          | (1)    |
|               | Lithuania               | 10     | 10       | (8)  |                          | Colombia A         | 70          | 70          | (1)    |
|               | Hungary                 | 20     | 19       | (8)  |                          | Colombia B         | 26          | 26          | (11)   |
|               | Poland                  | 16     | 16       | (7)  |                          | Dominican Republic | 27          | 27          | (11)   |
|               | Belorussia              | 8      | 8        | (8)  |                          | Ecuador            | 20          | 19          | (11)   |
|               | Russia                  | 25     | 25       | (2)  |                          | Maya               | 21          | 21          | (2)    |
|               |                         |        |          |      |                          | Mexico             | 68          | 64          | (1)    |
|               |                         |        |          |      |                          | Peru               | 70          | 69          | (1)    |
|               |                         |        |          |      |                          | Puerto Rico A      | 70          | 70          | (1)    |
|               |                         |        |          |      |                          | Puerto Rico B      | 27          | 26          | (11)   |
|               |                         |        |          |      | <b>TOTAL</b>             |                    | <b>4139</b> | <b>3960</b> |        |

\*The term "Khoisan" refers to Guldemann and Fehn, 2014<sup>12</sup>.

Supplementary Table 1: Overview of the analyzed populations and their sample size before (pre QC) and after (After QC) the quality control described in the Methods section.

| Continent   | Group                  | Cluster Name                                                                     | Cluster composition                                                                     |                                     |
|-------------|------------------------|----------------------------------------------------------------------------------|-----------------------------------------------------------------------------------------|-------------------------------------|
| Africa      | <i>W Africa</i>        | Yoruba                                                                           | Yoruba A 101;Yoruba B 21                                                                |                                     |
|             |                        | <i>Senegambia</i>                                                                |                                                                                         |                                     |
|             | <i>E Africa</i>        | Mandenka 1                                                                       | Mandenka 3                                                                              |                                     |
|             |                        | Mandenka 2                                                                       | Mandenka 19                                                                             |                                     |
|             |                        | Bantu Kenya 1                                                                    | Bantu Kenya 2                                                                           |                                     |
|             |                        | Bantu Kenya 2                                                                    | Luhya 2                                                                                 |                                     |
|             | <i>SW Africa</i>       | Bantu Kenya 3                                                                    | Luhya 39;Bantu Kenya 6                                                                  |                                     |
|             |                        | Bantu Kenya 4                                                                    | Luhya 46;Bantu Kenya 2                                                                  |                                     |
|             |                        | Herero 1                                                                         | Herero 1                                                                                |                                     |
|             |                        | Herero 2                                                                         | Herero 6                                                                                |                                     |
|             |                        | Herero 3                                                                         | Herero 1                                                                                |                                     |
|             | <i>S Africa</i>        | Herero 4                                                                         | South Africa Bantu A 1;Herero 1                                                         |                                     |
|             |                        | Herero 5                                                                         | Herero 3                                                                                |                                     |
|             |                        | South Africa Bantu 1                                                             | South Africa Bantu B 1                                                                  |                                     |
|             |                        | South Africa Bantu 2                                                             | South Africa Bantu C 8; Amaxhosa 1                                                      |                                     |
|             |                        | South Africa Bantu 3                                                             | South Africa Bantu C 8                                                                  |                                     |
|             |                        | South Africa Bantu 4                                                             | South Africa Bantu C 7                                                                  |                                     |
|             |                        | South Africa Bantu 5                                                             | South Africa Bantu C 6                                                                  |                                     |
|             |                        | South Africa Bantu 6                                                             | South Africa Bantu B 1                                                                  |                                     |
|             |                        | South Africa Bantu 7                                                             | South Africa Bantu C 2                                                                  |                                     |
|             |                        | South Africa Bantu 8                                                             | South Africa Bantu C 9;AmaXhosa 13; South Africa Bantu B 2                              |                                     |
|             |                        | South Africa Bantu 9                                                             | South Africa Bantu C 13;South Africa Bantu A 3;South Africa Bantu B 6                   |                                     |
|             | South Africa Bantu 10  | South Africa Bantu C 18;South Africa Bantu A 1;South Africa Bantu B 3            |                                                                                         |                                     |
|             | South Africa Bantu 11  | South Africa Bantu C 23;South Africa Bantu B 7;AmaXhosa 1 South Africa Bantu A 1 |                                                                                         |                                     |
|             | <i>Khoisan/Pygmies</i> | San 1                                                                            | San B 1                                                                                 |                                     |
|             |                        | San 2                                                                            | San B 7;San A 5;San C 2                                                                 |                                     |
|             |                        | San 3                                                                            | San B 7;San A;14 San C 3                                                                |                                     |
|             |                        | Sandawe 1                                                                        | Sandawe 1                                                                               |                                     |
|             |                        | Sandawe 2                                                                        | Sandawe 2                                                                               |                                     |
|             |                        | Sandawe 3                                                                        | Sandawe 8                                                                               |                                     |
|             |                        | Sandawe 4                                                                        | Sandawe 3                                                                               |                                     |
|             |                        | Sandawe 5                                                                        | Sandawe 9                                                                               |                                     |
| Mbuti Pigmy |                        | Mbuti Pigmy 13                                                                   |                                                                                         |                                     |
| Biaka Pigmy |                        | Biaka Pigmy 21                                                                   |                                                                                         |                                     |
| Europe      |                        | <i>NW Europe</i>                                                                 | Great Britain 1                                                                         | Great Britain 2                     |
|             | Great Britain 2        |                                                                                  | Great Britain 29                                                                        |                                     |
|             | Great Britain 3        |                                                                                  | Great Britain 2                                                                         |                                     |
|             | Great Britain 4        |                                                                                  | Great Britain 40;Ireland 7;Scotland 6;France 3;England 6;Wales 4; Germany and Austria 2 |                                     |
|             | Norway                 |                                                                                  | Norway 17                                                                               |                                     |
|             | France                 |                                                                                  | France 22                                                                               |                                     |
|             | Orkney 1               |                                                                                  | Great Britain 2                                                                         |                                     |
|             | Orkney 2               |                                                                                  | Great Britain 18;Orkney 6                                                               |                                     |
|             | Orkney 3               |                                                                                  | Great Britain 3, Orkney 3                                                               |                                     |
|             | <i>NE Europe</i>       |                                                                                  | Lithuania                                                                               | Lithuania 9                         |
|             |                        |                                                                                  | Poland                                                                                  | Poland 16;Belorussia 8; Lithuania 1 |
|             |                        | Hungary                                                                          | Hungary 19;Germany and Austria 2                                                        |                                     |
|             |                        | Russia                                                                           | Russia 25                                                                               |                                     |
|             |                        | Finland 1                                                                        | Finland A 20                                                                            |                                     |



|                          |             |                                             |
|--------------------------|-------------|---------------------------------------------|
| <i>SW Europe</i>         | Finland 2   | Finland A 44,Finland B1                     |
|                          | Finland 3   | Finland A 7, Norway 1                       |
|                          | Finland 4   | Finland A 29, Finland B 1                   |
| <i>SE Europe</i>         | Spain 1     | Spain A 5                                   |
|                          | Spain 2     | Spain A27;Spain B 12                        |
|                          | Spain 3     | Spain A24;Spain B 13                        |
|                          | Spain 4     | Spain A 18;Spain B 7;France 1               |
|                          | Spain 5     | Spain A 15;Spain B 2;France 1               |
| <i>Basque</i>            | Romania 1   | Romania 1                                   |
|                          | Cyprus      | Cyprus 12                                   |
|                          | South Italy | West Sicily 9;South Italy 18; East Sicily10 |
|                          | Georgia     | Georgia 19                                  |
|                          | Bulgaria 1  | Bulgaria 2;Georgia 1                        |
|                          | Bulgaria 2  | Romania 13;Bulgary 16                       |
|                          | Greece      | Greece 20, West Sicily 1                    |
|                          | North Italy | France 1;North Italy 12                     |
|                          | Tuscany 1   | Tuscany A 61;Tuscany B 8                    |
|                          | Tuscany 2   | Tuscany A 37                                |
| <i>Sardinia</i>          | Basque 1    | Spain A 8                                   |
|                          | Basque 2    | Basque 24                                   |
| <b>East Asia/America</b> | Sardinia 1  | Sardinia 6                                  |
|                          | Sardinia 2  | Sardinia 9                                  |
|                          | Sardinia 3  | Sardinia 13                                 |
| <b>East Asia/America</b> | Karitiana 1 | Karitiana 1                                 |
|                          | Colombia 1  | Colombia 1                                  |
|                          | Colombia 2  | Colombia 6                                  |
|                          | Surui       | Surui 8                                     |
|                          | Karitiana 2 | Karitiana 13                                |
|                          | Pima 1      | Pima 7                                      |
|                          | Pima 2      | Pima 7                                      |
| China                    | China 100   |                                             |

Supplementary Table 2: Overview and composition of the clusters inferred by fineSTRUCTURE analysis.

Supplementary References:

1. Consortium, T. 1000 G. P. A map of human genome variation from population-scale sequencing. *Nature* **467**, 1061–1073 (2010).
2. Li, J. Z. *et al.* Worldwide human relationships inferred from genome-wide patterns of variation. *Science* **319**, 1100–1104 (2008).
3. Schlebusch, C. M. *et al.* Genomic Variation in Seven Khoe-San Groups Reveals Adaptation and Complex African History. *Science* **338**, 374–379 (2012).
4. Petersen, D. C. *et al.* Complex Patterns of Genomic Admixture within Southern Africa. *PLoS Genet* **9**, e1003309 (2013).
5. May, A. *et al.* Genetic diversity in black South Africans from Soweto. *BMC Genomics* **14**, 644 (2013).
6. Henn, B. M. *et al.* Hunter-gatherer genomic diversity suggests a southern African origin for modern humans. *PNAS* **108**, 5154–5162 (2011).
7. Hellenthal, G. *et al.* A Genetic Atlas of Human Admixture History. *Science* **343**, 747–751 (2014).
8. Behar, D. M. *et al.* The genome-wide structure of the Jewish people. *Nature* **466**, 238–242 (2010).
9. Yunusbayev, B. *et al.* The Caucasus as an asymmetric semipermeable barrier to ancient human migrations. *Mol Biol Evol* msr221 (2011).  
doi:10.1093/molbev/msr221
10. Illumina Inc. Illumina IControl Database. at <<http://genomeinformaticsalliance.org/science/icontrolldb.ilmn>>
11. Bryc, K. *et al.* Genome-wide patterns of population structure and admixture among Hispanic/Latino populations. *Proceedings of the National Academy of Sciences* **107**, 8954–8961 (2010).
12. Güldemann, T. & Fehn, A.-M. *Beyond 'Khoisan': Historical relations in the Kalahari Basin*. (John Benjamins Publishing Company, 2014).
